# Supplementary material for: Unravelling the Genetic Basis of Moisture Deficit Stress Tolerance in Wheat for Seedling Vigour-Related Traits and Root Traits Using Genome-Wide Association Study
Source: MDPI journal article supplement (doi:10.3390/genes14101902), 2023-09-30
Supplement: s1 [file s1]

**Supplementary table1: Genotypes used for GWAS along with their pedigree details**

| Genotypes | Pedigree information                                                                       | Accession type | Developing Institute             | Year of Release |
|-----------|--------------------------------------------------------------------------------------------|----------------|----------------------------------|-----------------|
| C591      | PENJAB-TYPE-8-B/PENJAB-TYPE-9                                                              | Indian variety | Department of Agriculture,Punjab | -               |
| CBW38     | CNDO/R 143/ENTE /MEXI_2/3/Ae.SQU ARROSA (TAUS)/4/WEAVER/5/2*PA STOR                        | Indian variety | IIWBR, Karnal, Haryana           | 2009            |
| CG1029    | -                                                                                          | Indian variety | -                                | -               |
| Chirya-3  | CHINESE-SPRING/AG.CU//GLENNSON-81/3/ALONDRA/PAVON-76/4/NINGMAI-4/OLESEN//ALONDRA/YANGMAI-4 | Exotic Variety | Mexico                           | 1992            |
| CS100     | PUB94.15.1.12/FRTL                                                                         | Exotic line    | CIMMYT, Mexico                   | -               |
| CS110     | NORD-DESPREZ/VG-9144//KALYANSONA/BLUEBIRD/3/YACO/4/VEERY-5                                 | Exotic line    | CIMMYT, Mexico                   | -               |
| CS112     | 76ECN44/76ECN36//MADDEN/6*RAC177                                                           | Exotic line    | CIMMYT, Mexico                   | -               |
| CS128     | BAV92/SERI                                                                                 | Exotic line    | CIMMYT, Mexico                   | -               |
| CS129     | SB025                                                                                      | Exotic line    | CIMMYT, Mexico                   | -               |
| CS134     | PASTOR//HXL7573/2*BAU/3/MEX94.2.19//ATTILA/3*BCN                                           | Exotic line    | CIMMYT, Mexico                   | -               |
| CS14      | DRYSDALE                                                                                   | Exotic line    | CIMMYT, Mexico                   | -               |
| CS141     | PUB94.15.1.12/3/FRTL//ATTILA/3*BCN                                                         | Exotic line    | CIMMYT, Mexico                   | -               |
| CS143     | AUS30354                                                                                   | Exotic line    | CIMMYT, Mexico                   | -               |
| CS144     | CIANO-79/PARULA//CHILERO                                                                   | Exotic line    | CIMMYT, Mexico                   | -               |
| CS145     | LOVE-HH-129                                                                                | Exotic line    | CIMMYT, Mexico                   | -               |
| CS15      | SOKOLL                                                                                     | Exotic line    | CIMMYT, Mexico                   | -               |
| CS17      | BERKUT                                                                                     | Exotic line    | CIMMYT, Mexico                   | -               |
| CS18      | KUKRI/EXCALIBUR                                                                            | Exotic line    | CIMMYT, Mexico                   | -               |
| CS19      | MEX94.2.19/PUB94.15.1.12                                                                   | Exotic line    | CIMMYT, Mexico                   | -               |
| CS23      | PASTOR//HXL7573/2*BAU/3/CMH82.575/CMH82.801                                                | Exotic line    | CIMMYT, Mexico                   | -               |
| CS27      | PARUS/3/CHEN/AE.SQ//2*OPATA                                                                | Exotic line    | CIMMYT, Mexico                   | -               |
| CS28      | W15.92/4/PASTOR//HXL7573/2*BAU/3/WBLL1                                                     | Exotic line    | CIMMYT, Mexico                   | -               |
| CS32      | BAV92/SERI                                                                                 | Exotic line    | CIMMYT, Mexico                   | -               |
| CS38      | PFAU/SERI-82(CID-93300//BOBWHITE                                                           | Exotic line    | CIMMYT, Mexico                   | -               |

|        |                                                                                                      |                |                       |      |
|--------|------------------------------------------------------------------------------------------------------|----------------|-----------------------|------|
| CS4    | JANZ                                                                                                 | Exotic line    | CIMMYT, Mexico        |      |
| CS40   | MEX94.27.1.20/3/SOKOLL//ATTILA/3*BCN                                                                 | Exotic line    | CIMMYT, Mexico        |      |
| CS41   | SSRT16                                                                                               | Exotic line    | CIMMYT, Mexico        | -    |
| CS42   | BOBWHITE/NACUZARI-76//VEERY/3/BLUEJAY/COCORAQUE-75                                                   | Exotic line    | CIMMYT, Mexico        | -    |
| CS46   | BAV92/SERI                                                                                           | Exotic line    | CIMMYT, Mexico        | -    |
| CS53   | OAX93.24.35//SOKOLL/WBLL1                                                                            | Exotic line    | CIMMYT, Mexico        |      |
| CS58   | BAV92/SERI                                                                                           | Exotic line    | CIMMYT, Mexico        |      |
| CS64   | PUB94.15.1.12/FRTL                                                                                   | Exotic line    | CIMMYT, Mexico        |      |
| CS66   | SERI/BAV92//WBLL1                                                                                    | Exotic line    | CIMMYT, Mexico        |      |
| CS69   | KUKRI/RAC875                                                                                         | Exotic line    | CIMMYT, Mexico        | -    |
| CS7    | SSRT09                                                                                               | Exotic line    | CIMMYT, Mexico        |      |
| CS71   | HARTOG                                                                                               | Exotic line    | CIMMYT, Mexico        |      |
| CS74   | AUS30518                                                                                             | Exotic line    | CIMMYT, Mexico        |      |
| CS78   | VJ99                                                                                                 | Exotic line    | CIMMYT, Mexico        |      |
| CS80   | SSRT65                                                                                               | Exotic line    | CIMMYT, Mexico        |      |
| CS86   | SB187                                                                                                | Exotic line    | CIMMYT, Mexico        | -    |
| CS89   | RAC 655                                                                                              | Exotic line    | CIMMYT, Mexico        |      |
| CS90   | AUS30523                                                                                             | Exotic line    | CIMMYT, Mexico        |      |
| CS92   | KRICHAUFF                                                                                            | Exotic line    | CIMMYT, Mexico        |      |
| CS93   | PASTOR//HXL7573/2*BAU/3/MEX94.2.19//ATTILA/3*BCN                                                     | Exotic line    | CIMMYT, Mexico        |      |
| CS94   | MEX94.2.19//SOKOLL/WBLL1                                                                             | Exotic line    | CIMMYT, Mexico        | -    |
| DBW107 | -                                                                                                    | Indian variety | -                     |      |
| DBW110 | KIRITATI/4/2*SERI1B*2/3/KAUZ*2/BOW//KAUZ                                                             | Indian variety | IWBR, Karnal, Haryana | 2015 |
| DBW14  | RAJ 3765/PBW 343                                                                                     | Indian variety | IWBR, Karnal, Haryana | 2003 |
| DBW16  | RAJ 3765/WR 484//HUW 468                                                                             | Indian variety | IWBR, Karnal, Haryana | 2006 |
| DBW17  | CMH79A.95/3*CNO 79//RAJ3777                                                                          | Indian variety | IWBR, Karnal, Haryana | 2007 |
| DBW173 | KAUZ/AA//KAUZ/P BW602                                                                                | Indian variety | IWBR, Karnal, Haryana | 2018 |
| DBW187 | NAC/TH/AC//3*PVN/3/MIRLO/BUC/4/ 2*PASTOR/5/KACHU/6/KACHU                                             | Indian variety | IWBR, Karnal, Haryana | 2019 |
| DBW222 | KACHU/SAUAL*ATTILA*2/PBW65/6/PVN//CAR422/<br>ANA/5/BOW/CROW//BUC/PVN/3/YR/4/TRAP#1/7/ATTILA/2*PASTOR | Indian variety | IWBR, Karnal, Haryana | 2020 |

|           |                                                                                  |                |                                |      |
|-----------|----------------------------------------------------------------------------------|----------------|--------------------------------|------|
| DBW296    | -                                                                                | Indian variety | -                              |      |
| DBW303    | -                                                                                | Indian variety | -                              |      |
| DBW39     | ATTILA/HUI                                                                       | Indian variety | IIWBR, Karnal, Haryana         | 2010 |
| DBW43     | BA BAX/LR42// BABAX*2/3/VIVITSI                                                  | Breeding line  | IIWBR, Karnal, Haryana         | -    |
| DBW51     | SITELLA/MILAN                                                                    | Breeding line  | IIWBR, Karnal, Haryana         | -    |
| DBW88     | KAUZ//ALTAR84/AOS/3/MILAN/KAUZ/4/HUITES                                          | Indian variety | IIWBR, Karnal, Haryana         | 2014 |
| DL1266-2  | -                                                                                | Indian variety | -                              |      |
| DL153-2   | TANORI 71/ NP 890                                                                | Indian variety | IARI, New Delhi                | 1985 |
| DL788-2   | K7537/HD2160/ HD2278//L24/K4.14                                                  | Indian variety | IARI, New Delhi                | 1997 |
| Drysdale  | HARTOG*3/QUARRION                                                                | Exotic Variety | Australia                      | 2001 |
| Excalibur | RAC-177(Sr26)/UNICULM-492//RAC-311-S                                             | Exotic Variety | Australia                      | 2001 |
| Frontana  | FRONTEIRA/MENTANA                                                                | Exotic Variety | brazil                         | 1930 |
| GW273     | CPAN 2084/VW 205                                                                 | Indian variety | SDAU RS, Vijapur, Gujarat      | 1998 |
| GW322     | GW 173/GW 196                                                                    | Indian variety | SDAU RS, Vijapur, Gujarat      | 2002 |
| GW366     | DL 802-3/GW 232                                                                  | Indian variety | JAU, Junagadh, Gujarat         | 2007 |
| GW451     | GW324/4/CROC_1/AE.RA RS,QUARROSA(205)//J U Vijapur P/ JY/3/SKAUZ /4/KAUZ/5/GW339 | Indian variety | JAU, Junagadh, Gujarat         | 2016 |
| GW513     | -                                                                                | Indian variety | -                              |      |
| Halna     | HD 1982/K816                                                                     | Indian variety | CSAUA&T, Kanpur, Uttar Pradesh | 2001 |
| HB208     | SPO/MTA//MQ /2*RNW//3/PJ' S'/P14/KT54B                                           | Indian variety | Bhowali, Uttarakhand           | 1982 |
| HD2009    | LR 64A /NAI 60                                                                   | Indian variety | IARI, New Delhi                | 1975 |
| HD2189    | HD 1963 / HD 1931                                                                | Indian variety | IARI, New Delhi                | 1980 |
| HD2329    | HD 1962/E 4870/3/K 65/5/HD1553/4/UP262                                           | Indian variety | IARI, New Delhi                | 1985 |
| HD2687    | CPAN2009/HD 2329                                                                 | Indian variety | IARI, New Delhi                | 1999 |
| HD2733    | ATTILA /3/TUI /CARC //CHEN / CHTO /4/ATTILA                                      | Indian variety | IARI, New Delhi                | 2001 |
| HD2824    | PTO-1 /CNO79/PRL /GAA /3/HD 1951                                                 | Indian variety | IARI, New Delhi                | 2004 |
| HD2833    | PBW 226 / HW 1042//HD 2285                                                       | Indian variety | IARI, New Delhi                | 2006 |
| HD2851    | CPAN 3004/WR426//HW 2007                                                         | Indian variety | IARI, New Delhi                | 2005 |

|                     |                                                                                         |                |                                 |      |
|---------------------|-----------------------------------------------------------------------------------------|----------------|---------------------------------|------|
| HD2864              | DL 509-2/ DL 377-8                                                                      | Indian variety | IARI, New Delhi                 | 2005 |
| HD2888              | C306/T.sphaerococcum//HW 2004                                                           | Indian variety | IARI, New Delhi                 | 2006 |
| HD2894              | HW 2002/WR 196                                                                          | Indian variety | IARI, New Delhi                 | 2008 |
| HD2932              | KAUZ/STAR//HD 2643                                                                      | Indian variety | IARI, New Delhi                 | 2008 |
| HD2967              | ALD/COC//URES/HD216 0M/HD2278                                                           | Indian variety | IARI, New Delhi                 | 2011 |
| HD2982              | -                                                                                       | Breeding line  | IARI, New Delhi                 | -    |
| HD2985              | PBW 343/ PASTOR                                                                         | Indian variety | IARI, New Delhi                 | 2011 |
| HD2987              | HI1011/HD2348//M ENDOS//IWP 72/DL153-2                                                  | Indian variety | IARI, New Delhi                 | 2011 |
| HD3043              | -                                                                                       | Indian variety | IARI, New Delhi                 |      |
| HD3059              | KAUZ//ALTAR84/ AOS/3/MILAN/KA UZ/4/HUITES                                               | Indian variety | IARI, New Delhi                 | 2013 |
| HD3086              | DBW14/HD2733//HUW468                                                                    | Indian variety | IARI, New Delhi                 | 2014 |
| HD3090              | SFW/VAISHALI// UP2425                                                                   | Indian variety | IARI, New Delhi                 | 2014 |
| HD3118              | ATTILA*2/PBW65 //WBLL1*2/TUKU RU                                                        | Indian variety | IARI, New Delhi                 | 2015 |
| HD3171              | PBW 343/HD 2879                                                                         | Indian variety | IARI, New Delhi                 | 2017 |
| HD3226              | GRACKLE/HD2894                                                                          | Indian variety | IARI, New Delhi                 | 2019 |
| HD3237              | HD3016/HD2967                                                                           | Indian variety | IARI, New Delhi                 | 2019 |
| HD3249              | PBW343*2/KUKUNA//SRTU/3/PBW343*2/KHVAKI                                                 | Indian variety | IARI, New Delhi                 | 2020 |
| HD3354              | QUAIU#1/3/T.DICOCCONPI94625/AE.SQ(372)//3*PASTOR/4/<br>QUAIU#2/5/VALI/6/B ECARD/QUAIU#1 | Breeding line  | IARI, New Delhi                 | -    |
| HD3362              | -                                                                                       | Indian variety | IARI, New Delhi                 |      |
| HDR77               | PARTIZANKA /HD 2204 //HD2204                                                            | Indian variety | IARI, New Delhi                 | 1990 |
| HI 1500<br>(AMRITA) | HW 2002*2// STREMPALLI/PN C 5                                                           | Indian variety | IARI RS, Indore, Madhya Pradesh | 2003 |
| HI1500              | HW 2002*2// STREMPALLI/PN C 5                                                           | Indian variety | IARI RS, Indore, Madhya Pradesh | 2003 |
| HI1531              | HI 1182/ CPAN 1990                                                                      | Indian variety | IARI RS, Indore, Madhya Pradesh | 2006 |
| HI1544              | HINDI62/BOBWHI TE/CPAN 2099                                                             | Indian variety | IARI RS, Indore, Madhya Pradesh | 2008 |
| HI1563              | MACS 2496*2/MC 10                                                                       | Indian variety | IARI RS, Indore, Madhya Pradesh | 2011 |

|                |                                                                                                                      |                 |                                   |      |
|----------------|----------------------------------------------------------------------------------------------------------------------|-----------------|-----------------------------------|------|
| HI1605         | BOW/VEE/5/ND/VG9 144//KAL/BB/3/YACO /4/CHIL/6/ CASKOR/3 /CROC_1/AE.SQUAR ROSA(224)//OPATA/7/PASTOR/MLAN/KAUZ/3/BAV92 | Indian variety  | IARI RS, Indore, Madhya Pradesh   | 2017 |
| HI1612         | Kauz//Altar84/AO S/3/Milan/Kauz/4/Huites                                                                             | Indian variety  | IARI RS, Indore, Madhya Pradesh   | 2018 |
| HI1628         | -                                                                                                                    | Indian variety  | IARI RS, Indore, Madhya Pradesh   |      |
| HI1633         | -                                                                                                                    | Indian variety  | IARI RS, Indore, Madhya Pradesh   |      |
| HI1634         | -                                                                                                                    | Indian variety  | IARI RS, Indore, Madhya Pradesh   |      |
| HI617          | Selection from C 306                                                                                                 | Indian variety  | IARI RS, Indore, Madhya Pradesh   | 1982 |
| Hindi-62       | PBW-226/HW-1042//HD-2285                                                                                             | Indian variety  | Introduction from India to Egypt  | -    |
| Hira           | YT54/N 10BIISN64                                                                                                     | Indian variety  | IARI, New Delhi                   | 1972 |
| HS490          | HS 364/HPW 114//HS 240/HS 346                                                                                        | Indian variety  | IARI RS, Shimla, Himachal Pradesh | 2009 |
| HS543          | -                                                                                                                    | Breeding line   | IARI RS, Shimla, Himachal Pradesh | -    |
| HS611          | 69-1776/663//2*BCN/3/7*BCN/4/PARUS/PASTOR                                                                            | Breeding line   | IARI RS, Shimla, Himachal Pradesh | -    |
| HUW468         | CPAN-1962 / TONI //LIRA'S'/ PRL'S'                                                                                   | Indian variety  | BHU, Varanasi, Uttar Pradesh      | 1999 |
| HUW510         | HD 2278/HUW 234//DL 230-16                                                                                           | Indian variety  | BHU, Varanasi, Uttar Pradesh      | 2001 |
| HUW666         | -                                                                                                                    | Indian variety  | BHU, Varanasi, Uttar Pradesh      | -    |
| HUW838         | -                                                                                                                    | Indian variety  | -                                 |      |
| HW2004         | C 306 *7 //TR 380-14 #7 /3 AG14                                                                                      | Indian variety  | IARI RS, Wellington, Tamilnadu    | 1997 |
| HW2045         | HD 2402 *6 /SUNSTAR *6 /C-80-1                                                                                       | Indian variety  | IARI RS, Wellington, Tamilnadu    | 2002 |
| IC42           | -                                                                                                                    | Uncharacterized | -                                 | -    |
| IC43           | -                                                                                                                    | Uncharacterized | -                                 | -    |
| IST SAMNYT 406 | Exotic Collection                                                                                                    | Breeding line   | Exotic Collection                 | -    |

|             |                                                                                                                                   |                |                                     |      |
|-------------|-----------------------------------------------------------------------------------------------------------------------------------|----------------|-------------------------------------|------|
| Janz        | 3-AG-3/4*CONDOR//COOK                                                                                                             | Exotic Variety | Australia                           | 1989 |
| JAUW672     | -                                                                                                                                 | Indian variety | -                                   |      |
| K1006       | PBW343/HP1731                                                                                                                     | Indian variety | CSAUA&T, Kanpur, Uttar Pradesh      | 2014 |
| K1317       | K0307/K9162                                                                                                                       | Indian variety | CSAUA&T, Kanpur, Uttar Pradesh      | 2018 |
| K65         | C591/NP773                                                                                                                        | Indian variety | CSAUA&T, Kanpur, Uttar Pradesh      | 1974 |
| K88         | VEERY "S"/WL 711                                                                                                                  | Indian variety | CSAUA&T, Kanpur, Uttar Pradesh      | 1993 |
| K9465       | -                                                                                                                                 | Indian variety | -                                   |      |
| Kachu #1    | KAUZ//ALTAR-84/(AOS)AWNED-ONAS/3/MILAN/KAUZ/4/HUITES                                                                              | Exotic Variety | CIMMYT, Mexico                      | 2012 |
| Kharchia65  | KHARCHIA LOCAL/EG 953                                                                                                             | Indian variety | RARI, Durgapura, Rajasthan          | 1970 |
| Kukri       | 76ECN44/76ECN36//MADDEN/6*RAC177                                                                                                  | Exotic Variety | Australia                           | 1999 |
| Kundan      | TANORI 71/ NP 890                                                                                                                 | Indian variety | IARI, New Delhi                     | 1985 |
| Lal Bahadur | S 54723 * RS 31-1 ML 293 BB*KAL2 ML 319 CNO-KAL*CD1 (KALINIA* INIA-BB) ML328 BB-KAL2 ML 408 RONCHA* KAL-NOR67 ML 414 TOB-INIA*KAL | Indian variety | RARI, Durgapura, Rajasthan          | 1971 |
| Lerma Rojo  | Y50/N 10B//L 52/3/2*LR                                                                                                            | Indian variety | IARI, New Delhi                     | 1969 |
| Lok Bold    | S308/S311                                                                                                                         | Indian variety | Lok Bharti, Sanosara, Gujarath      | -    |
| Lok1        | S308/S331                                                                                                                         | Indian variety | Lok Bharti, Sanosara, Gujarath      | 1982 |
| Lok67       | -                                                                                                                                 | Indian variety | -                                   | -    |
| MACS6222    | -                                                                                                                                 | Indian variety | -                                   |      |
| MP1203      | FASN/2 TEPOKA/3/ CHEN/A.SQUARRO SA/TA                                                                                             | Indian variety | JNKVV RS, Powarkheda, Madya Pradesh | 2009 |
| MP1358      | -                                                                                                                                 | Indian variety | -                                   |      |
| MP3224      | MP-403-2/GW-322                                                                                                                   | Breeding line  | JNKVV RS, Powarkheda, Madya Pradesh | -    |
| NI5439      | REMP 80/3*NP 710                                                                                                                  | Indian variety | MPKV RS, Niphad, Madya pradesh      | 1975 |
| NIAW3170    | -                                                                                                                                 | Indian variety | -                                   |      |

|            |                                                     |   |                |                                    |      |
|------------|-----------------------------------------------------|---|----------------|------------------------------------|------|
| NIAW34     | CNO 79/PRL “S”                                      |   | Indian variety | MPKV RS, Niphad,<br>Madya pradesh  | 1997 |
| NP 770     | KONOSU/NP-4                                         |   | Indian variety | IARI, New Delhi                    | -    |
| NP715      |                                                     | - | Indian variety | -                                  |      |
| NP852      | KF/2*NP 761                                         |   | Indian variety | IARI RS, Pusa, Bihar               | 1969 |
| NP866      |                                                     | - | Indian variety | -                                  |      |
| NW1014     | HAHN ‘S’                                            |   | Indian variety | NDUA&T, Faizabad, Uttar<br>Pradesh | 1997 |
| PBW175     | HD 2160 /WG 1025                                    |   | Indian variety | PAU, Ludhiana, Punjab              | 1989 |
| PBW644     |                                                     | - | Indian variety | -                                  |      |
| PBW65      | USA 255/K 816 /3/ WL 202                            |   | Indian variety | PAU, Ludhiana, Punjab              | 1987 |
| PBW681     | UP2338/KALYANSONA                                   |   | Breeding line  | PAU, Ludhiana, Punjab              | -    |
| PBW689     | PBW442/WH576//DWR232                                |   | Breeding line  | PAU, Ludhiana, Punjab              | -    |
| PBW723     | PBW343+Lr57/Yr40+Lr37/Yr17                          |   | Indian variety | PAU, Ludhiana, Punjab              | 2017 |
| PBW752     | BW621/4/PBW343//. YR10/6*AVOCET/3/3*PBW343/5/PBW621 |   | Indian variety | PAU, Ludhiana, Punjab              | 2018 |
| PBW771     | PBW550//YR15/6*AVOCET/3/2*PBW550)                   |   | Indian variety | PAU, Ludhiana, Punjab              | 2020 |
| Pissilocal | LV-MADHYA-PRADESH                                   |   | Landrace       | IARI RS, Indore, Madya<br>Pradesh  | -    |
| RAC875     | RAC-655/3/Sr21/4*LANCE//4*BAYONET                   |   | Exotic Variety | Australia                          | -    |
| Raj1482    | NAPO-TOB 'S'/8156/KAL-BB                            |   | Indian variety | RARI, Durgapura,<br>Rajasthan      | 1983 |
| Raj3077    | HD 2267/RAJ 1482/5/BB/INIA66' S'/NAPO               |   | Indian variety | RARI, Durgapura,<br>Rajasthan      | 1989 |
| RAJ3765    | HD 2402/VL639                                       |   | Indian variety | RARI, Durgapura,<br>Rajasthan      | 1996 |
| RAJ4037    | DL 788-2/RAJ 3717                                   |   | Indian variety | RARI, Durgapura,<br>Rajasthan      | 2004 |
| RAJ4083    |                                                     | - | Indian variety | -                                  |      |
| Raj4120    | PBW 343/V 1                                         |   | Indian variety | RARI, Durgapura,<br>Rajasthan      | 2009 |
| RAJ4229    | HW2048/RAJ4000                                      |   | Indian variety | RARI, Durgapura,<br>Rajasthan      | 2012 |
| RAJ4238    | HW 2021/RAJ 3765                                    |   | Indian variety | RARI, Durgapura,<br>Rajasthan      | 2016 |

|                    |                                             |                |                                   |      |
|--------------------|---------------------------------------------|----------------|-----------------------------------|------|
| Safed Lerma        | Y50//N10B/3/LR 52/3*LR                      | Indian variety | IARI, New Delhi                   | 1969 |
| Sharbati<br>Sonara | Amber Mutant of S64                         | Indian variety | IARI, New Delhi                   | 1969 |
| Sunco              | SUN-9-E-27*4/3-AG-14//WW-15/3/3*COOK        | Exotic Variety | Australia                         | 1986 |
| UP1109             | UP 262 /UP 368                              | Indian variety | GBPUA&T, Pantnagar,<br>Uttarkhand | 1987 |
| UP2425             | HD 2320/UP 2263                             | Indian variety | GBPUA&T, Pantnagar,<br>Uttarkhand | 1999 |
| UP262              | S 308/BAJIO 66                              | Indian variety | GBPUA&T, Pantnagar,<br>Uttarkhand | 1978 |
| VL829              | IBWSN149/CPAN 2099                          | Indian variety | VPKAS, almora,<br>Uttarkhand      | 2003 |
| VL892              | -                                           | Indian variety | -                                 |      |
| VL907              | DYBR 1982- 83/842 ABVD 50/VW9365//P BW 343  | Indian variety | VPKAS, almora,<br>Uttarkhand      | -    |
| Westonia           | CO-1190-203/84-W-127-501                    | Exotic Variety | Australia                         | 1997 |
| WH 730             | cpan2092/improved Lok1                      | Indian variety |                                   |      |
| WH1021             | NYOT95/SONAK                                | Indian variety |                                   | 2007 |
| WH1080             | 21ST SAWSN151                               | Indian variety | CCS HAU, Hisar, Haryana           | 2011 |
| WH1105             | -                                           | Indian variety | -                                 |      |
| WH1124             | MUNIA/CHTO/AM SEL                           | Indian variety | CCS HAU, Hisar, Haryana           | 2014 |
| WH1129             | CS/TH.CS//3*PVN/3/MIRLO/BUC/4/MILAN/5/TILHI | Breeding line  | CCS HAU, Hisar, Haryana           | -    |
| WH1142             | -                                           | Indian variety | -                                 |      |
| WH1252             | -                                           | Indian variety | -                                 |      |
| WH1270             | -                                           | Indian variety | -                                 |      |
| WH5420             | -                                           | Indian variety | -                                 |      |
| WR544              | KALYANSONA/ HD 1999//HD2204/DW 38           | Indian variety | IARI, New Delhi                   | 2005 |
