# Supplementary material for: Unravelling the Genetic Basis of Moisture Deficit Stress Tolerance in Wheat for Seedling Vigour-Related Traits and Root Traits Using Genome-Wide Association Study
Source: MDPI journal article supplement (doi:10.3390/genes14101902), 2023-09-30
Supplement: s1 [file s1]

**Supplementary Table 2. Descriptive statistics, analysis of variance (ANOVA) for seedling vigour-related traits and root traits across the two seasons under control condition.**

| SV     | Genotype     | Replication  | Season         | Genotype x Season | Mean $\pm$ SE       | CV    | LSD    |
|--------|--------------|--------------|----------------|-------------------|---------------------|-------|--------|
| DF     | 192          | 1            | 1              | 192               |                     |       |        |
| RE     | 0.05***      | 0.55***      | 1.18***        | 0.04***           | 1.36 $\pm$ 0.01     | 7.21  | 0.14   |
| GP     | 0.04***      | 0            | 0.09**         | 0.04***           | 1.44 $\pm$ 0.01     | 7.22  | 0.14   |
| MGT    | 0.29         | 0.18         | 0.5            | 0.31              | 2.06 $\pm$ 0.02     | 25.99 | 0.75   |
| AUC    | 277.9***     | 6.49         | 181.73         | 291.42***         | 150.13 $\pm$ 0.6    | 7.85  | 16.38  |
| CL     | 1.75***      | 0.02         | 4.23***        | 0.44***           | 3.51 $\pm$ 0.05     | 4.33  | 0.21   |
| SL     | 53***        | 0            | 1011.42***     | 43.72***          | 23.16 $\pm$ 0.26    | 4.8   | 1.54   |
| SDW    | 26.86***     | 9.48***      | 1706.63***     | 19.21***          | 13.02 $\pm$ 0.19    | 3.83  | 0.69   |
| SVI-I  | 472895.61    | 2774.56      | 7000365.84     | 369197.5          | 2221.33 $\pm$ 24.75 | 7     | 216.29 |
| SVI-II | 267582.76*** | 108533.44*** | 17801520.54*** | 197680.63***      | 1254.23 $\pm$ 18.62 | 6.53  | 113.89 |
| RL     | 132.12***    | 0.08         | 1069.89***     | 104.17***         | 40.97 $\pm$ 0.41    | 4.55  | 2.59   |
| RSA    | 3.22***      | 0.01         | 1.22***        | 2.65***           | 6.95 $\pm$ 0.06     | 4.42  | 0.43   |
| RD     | 0.03***      | 0            | 0*             | 0.03***           | 0.53 $\pm$ 0.01     | 4.52  | 0.03   |
| RV     | 0.01***      | 0            | 0.27***        | 0.01***           | 0.11 $\pm$ 0.00     | 5.65  | 0.01   |
| RT     | 993.58***    | 4.62         | 485.24***      | 797.76***         | 46.39 $\pm$ 1.13    | 5     | 3.23   |
| RF     | 1124.67***   | 24.44*       | 465.26***      | 897.44***         | 44.95 $\pm$ 1.21    | 4.95  | 3.1    |

\*\*\*0.1% level of significance; \*\*1% level of significance; \*5% level of significance; SV: source of variation; DF: degrees of freedom; Treatment: PEG-6000 treatment, RE: radicle emergence (%); GP: germination percentage (%); MGT: mean germination time (d); AUC: area under the curve; CL: coleoptile length (cm); SL: seedling length (cm); SDW: seedling dry weight (mg); SVI.I: seedling vigour index-I; SVI.II: seedling vigour index-II, RL; total root length (cm); RSA: root surface area (cm<sup>2</sup>); RD: average root diameter mm; RV: root volume (cm<sup>3</sup>) ; RT: number of root tips; RF: number of root forks; RE and GP were arc sine transformed.

**Supplementary Table 3. Descriptive statistics, analysis of variance (ANOVA) for seedling vigour-related traits and root traits across the two seasons under moisture deficit stress condition.**

| SV     | Genotype     | Replication | Season        | Genotype x Season | Mean $\pm$ SE      | CV    | LSD   |
|--------|--------------|-------------|---------------|-------------------|--------------------|-------|-------|
| DF     | 192          | 1           | 1             | 192               |                    |       |       |
| RE     | 0.24***      | 0.00        | 1.97***       | 0.18***           | 0.72 $\pm$ 0.02    | 10.07 | 0.10  |
| GP     | 0.09***      | 0.00        | 1.06***       | 0.07***           | 1.06 $\pm$ 0.01    | 5.79  | 0.09  |
| MGT    | 0.64***      | 0.20        | 4.67***       | 0.47***           | 2.59 $\pm$ 0.03    | 8.81  | 0.32  |
| AUC    | 1606.14***   | 1345.24***  | 46940.72***   | 1477.94***        | 106.77 $\pm$ 1.44  | 9.64  | 14.30 |
| CL     | 0.86***      | 0.00        | 15.93***      | 0.63***           | 1.94 $\pm$ 0.03    | 4.66  | 0.13  |
| SL     | 25.15***     | 0.29        | 1957.84***    | 25.70***          | 11.21 $\pm$ 0.18   | 5.22  | 0.81  |
| SDW    | 52.86***     | 0.45        | 281.59***     | 53.18***          | 8.83 $\pm$ 0.26    | 5.76  | 0.71  |
| SVI-I  | 233237.70*** | 15869.11    | 4241503.20*** | 205689.82***      | 830.64 $\pm$ 17.38 | 8.42  | 97.28 |
| SVI-II | 510105.11*** | 7220.51     | 5238155.25*** | 522235.83***      | 655.23 $\pm$ 25.71 | 9.94  | 90.56 |
| RL     | 110.67***    | 0.00        | 17.15***      | 132.69***         | 10.61 $\pm$ 0.38   | 5.07  | 0.75  |
| RSA    | 2.93***      | 0.03*       | 0.61***       | 3.19***           | 1.74 $\pm$ 0.06    | 5.33  | 0.13  |
| RD     | 0.41***      | 0.00        | 0.23***       | 0.43***           | 0.64 $\pm$ 0.02    | 5.45  | 0.05  |
| RV     | 0.03***      | 0.00        | 0.01***       | 0.03***           | 0.05 $\pm$ 0.01    | 9.32  | 0.01  |
| RT     | 877.64***    | 1.89        | 789.66***     | 812.67***         | 20.93 $\pm$ 1.07   | 5.35  | 1.56  |
| RF     | 708.54***    | 0.40        | 80.2***       | 784.47***         | 18.45 $\pm$ 0.96   | 5.55  | 1.42  |

\*\*\*0.1% level of significance; \*\*1% level of significance; \*5% level of significance; SV: source of variation; DF: degrees of freedom; Treatment: PEG-6000 treatment, RE: radicle emergence (%); GP: germination percentage (%); MGT: mean germination time (d); AUC: area under the curve; CL: coleoptile length (cm); SL: seedling length (cm); SDW: seedling dry weight (mg); SVI.I: seedling vigour index-I; SVI.II: seedling vigour index-II, RL; total root length (cm); RSA: root surface area (cm<sup>2</sup>); RD: average root diameter mm; RV: root volume (cm<sup>3</sup>) ; RT: number of root tips; RF: number of root forks; RE and GP were arc sine transformed.
