# Supplementary material for: Unravelling the Genetic Basis of Moisture Deficit Stress Tolerance in Wheat for Seedling Vigour-Related Traits and Root Traits Using Genome-Wide Association Study
Source: MDPI journal article supplement (doi:10.3390/genes14101902), 2023-09-30
Supplement: s1 [file s1]

1 **Supplementary table 4. Putative candidate genes and molecular functions in the 100 kb Region of linked SNPs**

| Trait   | SNP         | Chromosome | Position  | Transcript ID             | Protein                                            | Function                                                                                                                                                               |
|---------|-------------|------------|-----------|---------------------------|----------------------------------------------------|------------------------------------------------------------------------------------------------------------------------------------------------------------------------|
| ALL_CL  | AX-94583923 | 2D         | 476696204 | <i>TraesCS2D02G372500</i> | Peptidase S10, serine carboxypeptidase             | Serine carboxypeptidase plays an important role in the drought tolerance of coleoptiles and the roots of spring wheat [1]                                              |
|         |             |            |           | <i>TraesCS2D02G372700</i> | DNA-binding pseudobarrel domain superfamily        | The B3 DNA-binding superfamily plays a significant role in the response to stresses in plants, as well as in the development of different parts of the plant [2]       |
| ALL_CL  | AX-95017965 | 2B         | 19070631  | <i>TraesCS2B02G042000</i> | UDP-glucuronosyl/UDP-glucosyltransferase           | UDP-glucuronosyl/UDP-glucosyltransferase confer drought tolerance in spring wheat [3]                                                                                  |
| ALL_CL  | AX-94773224 | 6B         | 650596466 | <i>TraesCS6B02G375700</i> | Zinc finger, SIAH-type                             | Up-regulated gene induced by drought stress in Tibetan hulless barley [4]                                                                                              |
| ALL_SDW | AX-94699286 | 4A         | 660988520 | <i>TraesCS4A02G383100</i> | O-methyltransferase domain                         | Overexpression of the wheat <i>TaCOMT</i> gene enhances drought tolerance and increases the content of melatonin in transgenic <i>Arabidopsis</i> [5]                  |
| ALL_SDW | AX-95103885 | 6D         | 13975625  | <i>TraesCS6D02G032900</i> | Alpha/Beta hydrolase fold                          | Plays a critical role in mediating lipid mobilization during seed germination and growth [6]                                                                           |
|         |             |            |           | <i>TraesCS6D02G033100</i> | RmlC-like cupin domain superfamily                 | The <i>Arabidopsis</i> cupin domain protein AtPirin1 interacts with the G protein alpha-subunit GPA1 and regulates seed germination and early seedling development [7] |
| ALL_RD  | AX-94446435 | 3D         | 43020473  | <i>TraesCS3D02G085400</i> | Pyridoxal phosphate-dependent transferase          | Up-regulated by drought stress in maize [8]                                                                                                                            |
| ALL_RD  | AX-94470331 | 4D         | 5694858   | <i>TraesCS4D02G012200</i> | 26S proteasome non-ATPase regulatory subunit Rpn12 | RPN12a is part of the <i>Arabidopsis</i> 26S proteasome that controls the stability of one or more of the factors involved in cytokinin regulation [9]                 |

|          |             |    |           |                           |                                                                     |                                                                                                                                                                                                      |
|----------|-------------|----|-----------|---------------------------|---------------------------------------------------------------------|------------------------------------------------------------------------------------------------------------------------------------------------------------------------------------------------------|
| ALL_RD   | AX-95234949 | 3A | 56390763  | <i>TraesCS3A02G087200</i> | AP2/ERF domain                                                      | Dehydration responsive element-binding factors (DBFs) belong to the AP2/ERF superfamily and play vital regulatory roles in abiotic stress responses in plants [10]                                   |
| ALL_RD   | AX-94811606 | 4D | 53243459  | <i>TraesCS4D02G079200</i> | P-type ATPase, subfamily IIB                                        | Role during root epidermis development and early seedling development via sucrose signalling [11]                                                                                                    |
| C_MGT    | AX-94471577 | 4A | 1890138   | <i>TraesCS4A02G002000</i> | WD40-repeat-containing domain superfamily                           | -                                                                                                                                                                                                    |
|          |             |    |           | <i>TraesCS4A02G002200</i> | Protein DCL-like                                                    | -                                                                                                                                                                                                    |
| D_SDW    | AX-94742835 | 2D | 90243264  | <i>TraesCS2D02G148700</i> | Transcription elongation factor, TFIIS/CRSP70, N-terminal, sub-type | Transcription factors (TFs) are involved in drought stress tolerance and response via an ABA signalling pathway [12]                                                                                 |
| D_SDW    | AX-94394580 | 5A | 700443596 | <i>TraesCS5A02G545500</i> | EF-hand domain                                                      | Plays a principal role in calcium signalling events in plants which is an essential nutrient for the normal development of the plant root and shoot tips and more specifically in cell division [13] |
|          |             |    |           | <i>TraesCS5A02G545800</i> | Invertase/pectin methylesterase inhibitor domain superfamily        | Early development of wheat grain endosperm and outer Layers [14]                                                                                                                                     |
|          |             |    |           | <i>TraesCS5A02G546200</i> | MFS transporter superfamily                                         | Role in nitrate signalling and seedling vigour [15]                                                                                                                                                  |
| D_SVI-II | AX-94926133 | 5A | 584713681 | <i>TraesCS5A02G387800</i> | RNA-binding domain superfamily                                      | Function in the regulation of shoot stem cell fates, root growth, gravitropic responses and embryo development [16]                                                                                  |
|          |             |    |           | <i>TraesCS5A02G387700</i> | Helicase superfamily 1/2, ATP-binding domain                        | play crucial roles in plant growth, development, and abiotic stress responses by regulating the degree of membrane lipid peroxidation [17]                                                           |
| S1C_AUC  | AX-95194336 | 2B | 9620943   | <i>TraesCS2B02G020200</i> | P-loop containing nucleoside triphosphate hydrolase                 | -                                                                                                                                                                                                    |

|            |             |    |           |                           |                                            |                                                                                                                                                                                                           |
|------------|-------------|----|-----------|---------------------------|--------------------------------------------|-----------------------------------------------------------------------------------------------------------------------------------------------------------------------------------------------------------|
| S1C_AUC    | AX-95194973 | 7B | 105011342 | <i>TraesCS7B02G090900</i> | Aspartic peptidase domain superfamily      | Role in gluten breakdown [18]                                                                                                                                                                             |
| S1D_AUC    | AX-94953183 | 6D | 16295427  | <i>TraesCS6D02G039600</i> | Papain-like cysteine peptidase superfamily | Play a role in seed germination, plant growth and development, organ senescence, immunity, and stress response [19]                                                                                       |
|            |             |    |           | <i>TraesCS6D02G039700</i> | Leucine-rich repeat domain superfamily     | The leucine-rich repeat receptor like kinases (LRRK) constitute the largest subfamily of receptor-like kinases (RLK), which play critical roles in plant development and stress responses [20]            |
| S1D_SDW    | AX-94620141 | 2D | 14772793  | <i>TraesCS2D02G040700</i> | Protein kinase-like domain superfamily     | Role in various plant processes, including growth, development, and stress response [21]                                                                                                                  |
| S1D_SDW    | AX-95094238 | 5A | 510891163 | <i>TraesCS5A02G302000</i> | AAA+ ATPase domain                         | Abiotic stress tolerance [22]                                                                                                                                                                             |
| S1D_SDW    | AX-94574509 | 1A | 9580120   | <i>TraesCS1A02G018800</i> | The domain of unknown function DUF4220     | DUF genes are associated with seedling development, root development, plant cell growth, and chloroplast movement [23]                                                                                    |
|            |             |    |           | <i>TraesCS1A02G018900</i> | Zinc finger C2H2 superfamily               | Key regulator of drought tolerance [24]                                                                                                                                                                   |
|            |             |    |           | <i>TraesCS1A02G019000</i> | V-ATPase proteolipid subunit C, eukaryotic | Role in root growth [25]                                                                                                                                                                                  |
| S1D_SDW    | AX-95232641 | 5B | 449131902 | <i>TraesCS5B02G265100</i> | C2 domain superfamily                      | Upregulated during drought and osmotic stress [26]                                                                                                                                                        |
| S1D_SDW    | AX-94873710 | 3A | 20004183  | <i>TraesCS3A02G036400</i> | ABC transporter-like, ATP-binding domain   | It is essential for both root growth and shoot growth in plants [27]                                                                                                                                      |
| S1D_SVI-II | AX-94485323 | 2D | 577599376 | <i>TraesCS2D02G474800</i> | F-box-like domain superfamily              | The F-box-like domain superfamily plays specific roles in protein degradation by post-translational modification in several biological processes including seed germination and seedling development [28] |

|         |             |    |           |                           |                                                               |                                                                                                                                          |
|---------|-------------|----|-----------|---------------------------|---------------------------------------------------------------|------------------------------------------------------------------------------------------------------------------------------------------|
|         |             |    |           | <i>TraesCS2D02G474900</i> | APO domain                                                    | APO expressed greater in early vigorous wheat cultivars [29]                                                                             |
| S2C_AUC | AX-94491917 | 3D | 429632555 | <i>TraesCS3D02G316300</i> | LysM domain superfamily                                       | LysM domain-containing proteins modulate stress response and signalling in wheat [30]                                                    |
| S2C_SL  | AX-94515822 | 1B | 638930477 | <i>TraesCS1B02G413800</i> | Bile acid: sodium symporter/arsenical resistance protein Acr3 | BILE ACID: SODIUM SYMPORTER FAMILY PROTEIN 2 (BASS2) repress ABI4 expression during seedling development by binding to its promoter [31] |

2

3

4 **Note;** ALL- control and Moisture deficit stress condition across the season, Combined, C: Control, D: Moisture deficit stress condition (PEG-6000 treatment), S1-Season 1,  
5 S2- Season 2; AUC: area under the curve; CL: coleoptile length (cm); SL: seedling length (cm); SDW: seedling dry weight (mg); SVI.I: seedling vigour index-I; SVI.II:  
6 seedling vigour index-II, RD: average root diameter (mm)

## References

1. Miazek, A.; Nykiel, M.; Rybka, K. Drought tolerance depends on the age of the spring wheat seedlings and differentiates patterns of proteinases. *Russ. J. Plant Physiol.* **2017**, *64*, 333-340.
2. Kandeel, M.; Morsy, M.A.; Abd El-Lateef, H.M.; Marzok, M.; El-Beltagi, H.S.; Al Khodair, K.M.; Venugopala, K.N. Genome-Wide Identification of B3 DNA-Binding Superfamily Members (ABI, HIS, ARF, RVL, REM) and Their Involvement in Stress Responses and Development in *Camelina sativa*. *Agron.* **2023**, *13*(3), 648.
3. Zahra, S.; Hussain, M.; Zulfiqar, S.; Ishfaq, S.; Shaheen, T.; Akhtar, M. EMS-based mutants are useful for enhancing drought tolerance in spring wheat. *Cereal Res. Commun.* **2021**, 1-12.
4. Yuan, S.; Xu, B.; Zhang, J.; Xie, Z.; Cheng, Q.; Yang, Z.; Cai, Q.; Huang, B. Comprehensive analysis of CCCH-type zinc finger family genes facilitates functional gene discovery and reflects recent allopolyploidization event in tetraploid switchgrass. *Genomics* **2015**, *16*, 1-16.
5. Yang, W.J.; Du, Y.T.; Zhou, Y.B.; Chen, J.; Xu, Z.S.; Ma, Y.Z.; Min, D.H. Overexpression of TaCOMT improves melatonin production and enhances drought tolerance in transgenic *Arabidopsis*. *Int. J. Mol. Sci.* **2019**, *20*(3), 652.
6. Mindrebo, J.T.; Nartey, C.M.; Seto, Y.; Burkart, M.D.; Noel, J.P. Unveiling the functional diversity of the alpha/beta hydrolase superfamily in the plant kingdom. *Curr. Opin. Struct. Biol.* **2016**, *41*, 233-246.
7. Lapik, Y.R.; Kaufman, L.S. The *Arabidopsis* cupin domain protein AtPirin1 interacts with the G protein  $\alpha$ -subunit GPA1 and regulates seed germination and early seedling development. *Plant Cell* **2003**, *15*(7), 1578-1590.
8. Khan, H.; Krishnappa, G.; Kumar, S.; Mishra, C.N.; Krishna, H.; Devate, N.B.; Singh, G. P. Genome-wide association study for grain yield and component traits in bread wheat (*Triticum aestivum* L.). *Front. genet.* **2022**, *13*, 982589.
9. Smalle, J.; Kurepa, J.; Yang, P.; Babiychuk, E.; Kushnir, S.; Durski, A.; Vierstra, R.D. Cytokinin growth responses in *Arabidopsis* involve the 26S proteasome subunit RPN12. *Plant Cell* **2002**, *14*(1), 17-32.
10. Xu, Z.S.; Ni, Z.Y.; Liu, L.; Nie, L.N.; Li, L.C.; Chen, M.; Ma, Y.Z. Characterization of the TaAIDFa gene encoding a CRT/DRE-binding factor responsive to drought, high-salt, and cold stress in wheat. *Mol. Genet. Genom.* **2008**, *280*, 497-508.

- 37 11. Garcia Bossi, J.; Kumar, K.; Barberini, M.L.; Domínguez, G.D.; Rondon Guerrero, Y.D.C.;  
38 Marino-Buslje, C.; Obertello, M.; Muschietti, J.P.; Estevez, J. M. The role of P-type IIA and  
39 P-type IIB Ca<sup>2+</sup>-ATPases in plant development and growth. *J. Exp. Bot.* **2020**, *71*(4), 1239-  
40 1248.
- 41 12. Barbosa Amorim, L.L.; Bezerra-Neto, J.P.; da Fonseca do Santos, R.; Ferreira Neto, J.R.C.;  
42 Kido, E.A.; Matos, M.; Benko-Iseppon, A.M. Transcription factors involved in plant drought  
43 tolerance regulation. *Drought Stress Tolerance in Plants, Vol 2: Molecular and Genetic*  
44 *Perspectives* **2016**, *2*, 315-358.
- 45 13. Mohanta, T.K.; Yadav, D.; Khan, A.L.; Hashem, A.; Abd\_Allah, E. F.; Al-Harrasi, A.  
46 Molecular players of EF-hand containing calcium signaling event in plants. *Int. J. Mol. Sci.*  
47 **2019**, *20*(6), 1476.
- 48 14. Mehdi, C.; Virginie, L.; Audrey, G.; Axelle, B.; Colette, L.; Helene, R.; Elisabeth, J.;  
49 Fabienne, G.; Mathilde, F.A. Cell wall proteome of wheat grain endosperm and outer layers at  
50 two key stages of early development. *Int. J. Mol. Sci.* **2019**, *21*(1), 239.
- 51 15. Li, W.; He, X.; Chen, Y.; Jing, Y.; Shen, C.; Yang, J.; Teng, W.; Zhao, X.; Hu, W.; Hu,  
52 M.; Li, H.; Tong, Y. A wheat transcription factor positively sets seed vigour by regulating the  
53 grain nitrate signal. *New Phytol.* **2020**, *225*(4), 1667-1680.
- 54 16. Sun, J.; Bie, X.M.; Wang, N.; Zhang, X.S.; Gao, X.Q. Genome-wide identification and  
55 expression analysis of YTH domain-containing RNA-binding protein family in common  
56 wheat. *BMC Plant Biol*, **2020**, *20*(1), 1-14.
- 57 17. Ru, J.N.; Hou, Z.H.; Zheng, L.; Zhao, Q.; Wang, F.Z.; Chen, J.; Xu, Z.S. Genome-wide  
58 analysis of DEAD-box RNA helicase family in wheat (*Triticum aestivum*) and functional  
59 identification of TaDEAD-box57 in abiotic stress responses. *Front. Plant Sci.*, **2021**, *12*,  
60 797276.
- 61 18. Bleukx, W.; Delcour, J.A. A second aspartic proteinase associated with wheat  
62 gluten. *J.Cereal Sci.* **2000**, *32*(1), 31-42.
- 63 19. Zou, Z.; Xie, G.; Yang, L. Papain-like cysteine protease encoding genes in rubber (*Hevea*  
64 *brasiliensis*): comparative genomics, phylogenetic, and transcriptional profiling  
65 analysis. *Planta*, **2017**, *246*, 999-1018.

- 66 20. Shumayla, Sharma, S.; Pandey, A.K.; Singh, K.; Upadhyay, S.K. Molecular  
67 characterization and global expression analysis of lectin receptor kinases in bread wheat  
68 (*Triticum aestivum*). *PLoS One* **2016**, *11*(4), e0153925.
- 69 21. Yan, J.; Su, P.; Wei, Z.; Nevo, E.; Kong, L. Genome-wide identification, classification,  
70 evolutionary analysis and gene expression patterns of the protein kinase gene family in wheat  
71 and *Aegilops tauschii*. *Lant Mol. Biol.* **2017**, *95*, 227-242.
- 72 22. Liu, S.; Cao, X.; Liao, Y.; Chen, R.; Xu, Z.; Gao, X.; Zhu, J. Identification and  
73 characterization of a novel abiotic stress responsive ATPase gene from rice. *Plant Omics*  
74 **2015**, *8*(2), 169-177.
- 75 23. Lv, P.; Wan, J.; Zhang, C.; Hina, A.; Al Amin, G. M.; Begum, N.; Zhao, T. Unraveling  
76 the Diverse Roles of Neglected Genes Containing Domains of Unknown Function (DUFs):  
77 Progress and Perspective. *Int. J. Mol. Sci.* **2023**, *24*(4), 4187.
- 78 24. Cheuk, A.; Ouellet, F.; Houde, M. The barley stripe mosaic virus expression system  
79 reveals the wheat C2H2 zinc finger protein TaZFP1B as a key regulator of drought  
80 tolerance. *BMC Plant Biol.* **2020**, *20*(1), 1-34.
- 81 25. Padmanaban, S.; Lin, X.; Perera, I.; Kawamura, Y.; Sze, H. Differential expression of  
82 vacuolar H<sup>+</sup>-ATPase subunit c genes in tissues active in membrane trafficking and their roles  
83 in plant growth as revealed by RNAi. *Plant Physiol* **2004**, *134*(4), 1514-1526.
- 84 26. Wang, J.; Ding, B.; Guo, Y.; Li, M.; Chen, S.; Huang, G.; Xie, X. Overexpression of a  
85 wheat phospholipase D gene, TaPLD $\alpha$ , enhances tolerance to drought and osmotic stress in  
86 *Arabidopsis thaliana*. *Planta* **2014**, *240*, 103-115.
- 87 27. Larsen, P.B.; Cancel, J.; Rounds, M.; Ochoa, V. *Arabidopsis* ALS1 encodes a root tip and  
88 stele localized half type ABC transporter required for root growth in an aluminum toxic  
89 environment. *Planta* **2007**, *225*, 1447-1458.
- 90 28. Hong, M.J.; Kim, J. B.; Seo, Y.W.; Kim, D.Y. F-box genes in the wheat genome and  
91 expression profiling in wheat at different developmental stages. *Genes* **2020**, *11*(10), 1154.
- 92 29. Hussain, M.I.; Araniti, F.; Schulz, M.; Baerson, S.; Vieites-Álvarez, Y.; Rempelos, L.; and  
93 Sánchez-Moreiras, A.M. Benzoxazinoids in wheat allelopathy—From discovery to application  
94 for sustainable weed management. *Environ. Exp. Bot.* **2022**, *202*, 104997.

- 95 30. Singh, K.; Upadhyay, S.K. LysM domain-containing proteins modulate stress response  
96 and signalling in *Triticum aestivum* L. *Environ. Exp. Bot.* **2021** *189*, 104558.
- 97 31. Zhao, Y.; Ai, X.; Wang, M.; Xiao, L.; Xia, G. A putative pyruvate transporter TaBASS2  
98 positively regulates salinity tolerance in wheat via modulation of ABI4 expression. *BMC Plant*  
99 *Biol* **2016**, *16*, 1-12.
